# Supplementary material for: Association between Circulating Vitamin D Level and Urolithiasis: A Systematic Review and Meta-Analysis
Source: MDPI journal article supplement (doi:10.3390/nu9030301), 2017-03-18
Supplement: s1 [file s1]

# Supplementary Materials: Association between circulating vitamin D Level and urolithiasis: a systematic review and meta-analysis

Henglong Hu, Jiaqiao Zhang, Yuchao Lu, Zongbiao Zhang, Baolong Qin, Hongbin Gao, Yufeng Wang, Jianning Zhu, Qing Wang, Yupeng Zhu, Yang Xun, Shaogang Wang

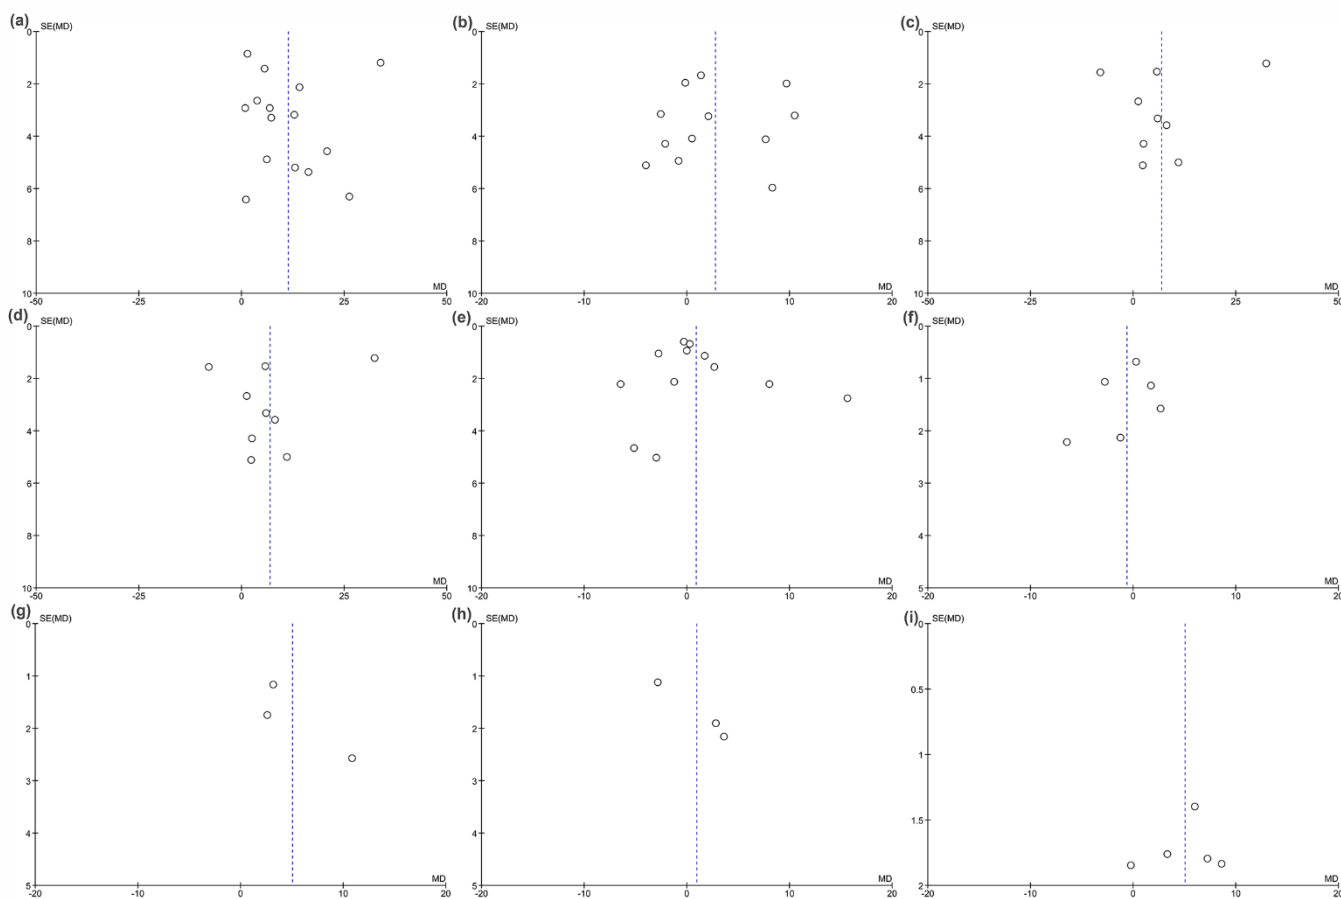

**Figure S1.** Funnel plots of comparisons of circulating 1,25(OH)<sub>2</sub>D between: (a) calcium stone formers and controls; (b) hypercalciuria stone formers and controls; (c) normocalciuria stone formers and controls; (d) hypercalciuria stone formers and normocalciuria stone formers. Funnel plots of comparisons of circulating 25(OH)D between: (e) stone formers and controls; (f) calcium stone formers and controls; (g) hypercalciuria stone formers and controls; (h) normocalciuria stone formers and controls; (i) hypercalciuria stone formers and normocalciuria stone formers.
